# Supplementary material for: Impact of Bariatric Surgery on Sarcopenia Related Parameters and Diagnosis—The Preliminary Results of EXPOBAR Study
Source: Preprints.org preprint supplement (doi:10.20944/preprints202407.1018.v1), 2024-07-12
Supplement: Supplementary file 2 [file Paper1. Table 4 - Algorithm to Diagnose Sarcopenia – EASO:ESPEN.docx]

**Table 4**. *Algorithm to Diagnose Sarcopenia –* EASO and ESPEN

*McNemar test; p-value<0,050 significant result relative to E0

ASMMI: Appendicular Skeletal Muscle Mass Index

|  | | | | |  |
| --- | --- | --- | --- | --- | --- |
| DIAGNOSE PROCEDURES | **Before Surgery** | After Surgery | | | |
|  | ***Baseline –***  ***E0*** | ***1month - E1*** | ***6month - E2*** | ***12month - E3*** | *24month - E4* |
| *SCREENING*  *1.* High BMI | 100% | 100% | 35.3% | 35.3% | 41.2% |
| *SCREENING*  *2.* High Waist circumference | 100% | 100% | 82.4% | 58.8% | 58.8% |
| *SCREENING*  *3.*  SARC-F | 70.6% | 88.2% | 70.6% | 58.8% | 0% |
| *SCREENING*  *1^2^3* | 70.6% | 88.2% | **35.3%*** | **35.3%*** | 0%* |
| *DIAGNOSIS*  *1.* Alteredskeletal muscle functional - Handgrip | 35.3% | **70.6%*** | **64.7%*** | 52.9% | 52.9% |
| *DIAGNOSIS*  *2.*  Altered body composition - ASMM/Weight | 94.1% | 88.2% | 70.6% | 88.2% | 94.1% |
| *DIAGNOSIS*  *1^2* | 35.3% | **70.6%*** | 41.2% | 52.9% | 52.9% |
| *STAGING – STAGE I: No complications* | 0 | 0 | 0 | 0 | 0 |
| *STAGING – STAGE II: Whit complications* | 100% | 100% | 100% | 100% | 100% |
