# Supplementary material for: Impact of Bariatric Surgery on Sarcopenia Related Parameters and Diagnosis—The Preliminary Results of EXPOBAR Study
Source: Preprints.org preprint supplement (doi:10.20944/preprints202407.1018.v1), 2024-07-12
Supplement: Supplementary file 4 [file Paper1.Table 3- Algorithm to Diagnose Sarcopenia – EWGSOP2 .docx]

**Table 3**. *Algorithm to Diagnose Sarcopenia –* EWGSOP2

|  | | | | |  |
| --- | --- | --- | --- | --- | --- |
| F-A-C-S | **Before Surgery** | After Surgery | | | |
|  | ***Baseline -***  ***E0*** | ***1month - E1*** | ***6month - E2*** | ***12month - E3*** | *24month - E4* |
| *FIND CASES - Screening*  SARC-F | 70.6% | 88.2% | 70.6% | 58.8% | 0%* |
| *ASSESS -* Skeletal muscle strength  HANDGRIP | 35.3% | **70.6%*** | **64.7%*** | 52.9% | 52.9% |
| *CONFIRM -* Skeletal muscle quantity  ASMMI | 0% | 0% | **11.8%*** | **29.4%*** | 52.9%* |
| *DIAGNOSIS - assess^confirm* | 0% | 0% | **11.8%*** | **29.4%*** | 52.9%* |
| *SEVERITY -* Physical Performance  400-m WALK TEST | 58.8% | 70.6% | 76.5% | 82.4%* | 94.1%* |

*McNemar test; p-value<0,050 significant result relative to E0

ASMMI: Appendicular Skeletal Muscle Mass Index
